# Supplementary material for: Genome-Wide Identification and Characterization of Long Noncoding RNAs of Brown to White Adipose Tissue Transformation in Goats
Source: MDPI journal article supplement (doi:10.3390/cells8080904), 2019-08-15
Supplement: s1 [file s1]

Sequences of qPCR primers for lncRNAs and UCP1

| Genes           | Accession numbers | Sense                  | Anti-Sense            | Optimum temperature | Amplicon length (bp) |
|-----------------|-------------------|------------------------|-----------------------|---------------------|----------------------|
| MSTRG.137412.1  | NC_030817.1       | TCTGGGTTTTAGCTAGCATGGA | GTCGAAGAAGGCACAAGCAA  | 56.9°C              | 196                  |
| MSTRG.167681.10 | NC_030819.1       | GATCGGGACACTATTTGCGG   | TGCTCGCGGACTCCAGATA   | 61.3°C              | 111                  |
| MSTRG.310247.4  | NC_030836.1       | TCTAACGAGATGGGGAGCCA   | TCTAGCACCTAAGCATGGCG  | 59.4°C              | 198                  |
| MSTRG.310246.1  | NC_030836.1       | CATTGTCCAACCTAAAATAG   | GGGGAATTTTGGTGGTCCAG  | 62.5°C              | 109                  |
| MSTRG.196987.6  | NC_030822.1       | ACGTCTGTACCCGAGTGTTC   | AGCGTTAGGAGACTGGAGGT  | 56.9°C              | 137                  |
| MSTRG.201344.1  | NC_030822.1       | AGTCCATGAACCACGCTCTG   | CTGGTAGGCACTGCGAGTAG  | 63.0°C              | 161                  |
| UCP1            | XM_018061376.1    | CAAGATCTCAGCGGGCCTAA   | TGTGCTTGCAGTCTGACCTT  | 62.3°C              | 87                   |
| $\beta$ -actin  | NM_001314342.1    | CCTGCGGCATTACGAAACTAC  | ACAGCACCGTGTGGCGTAGAG | 59.7°C              | 87                   |
